# Supplementary material
Source: PubMed Central journal article supplement (PMC3675262)
Supplement: mmc1.pdf [file mmc1.pdf]

The American Journal of Human Genetics, Volume 92

## **Supplemental Data**

### **Molecular Defects in the Motor Adaptor BICD2**

#### **Cause Proximal Spinal Muscular Atrophy**

#### **with Autosomal-Dominant Inheritance**

Kristien Peeters, Ivan Litvinenko, Bob Asselbergh, Leonardo Almeida-Souza, Teodora Chamova, Thomas Geuens, Elke Ydens, Magdalena Zimoń, Joy Irobi, Els De Vriendt, Vicky De Winter, Tinne Ooms, Vincent Timmerman, Ivailo Tournev, and Albena Jordanova

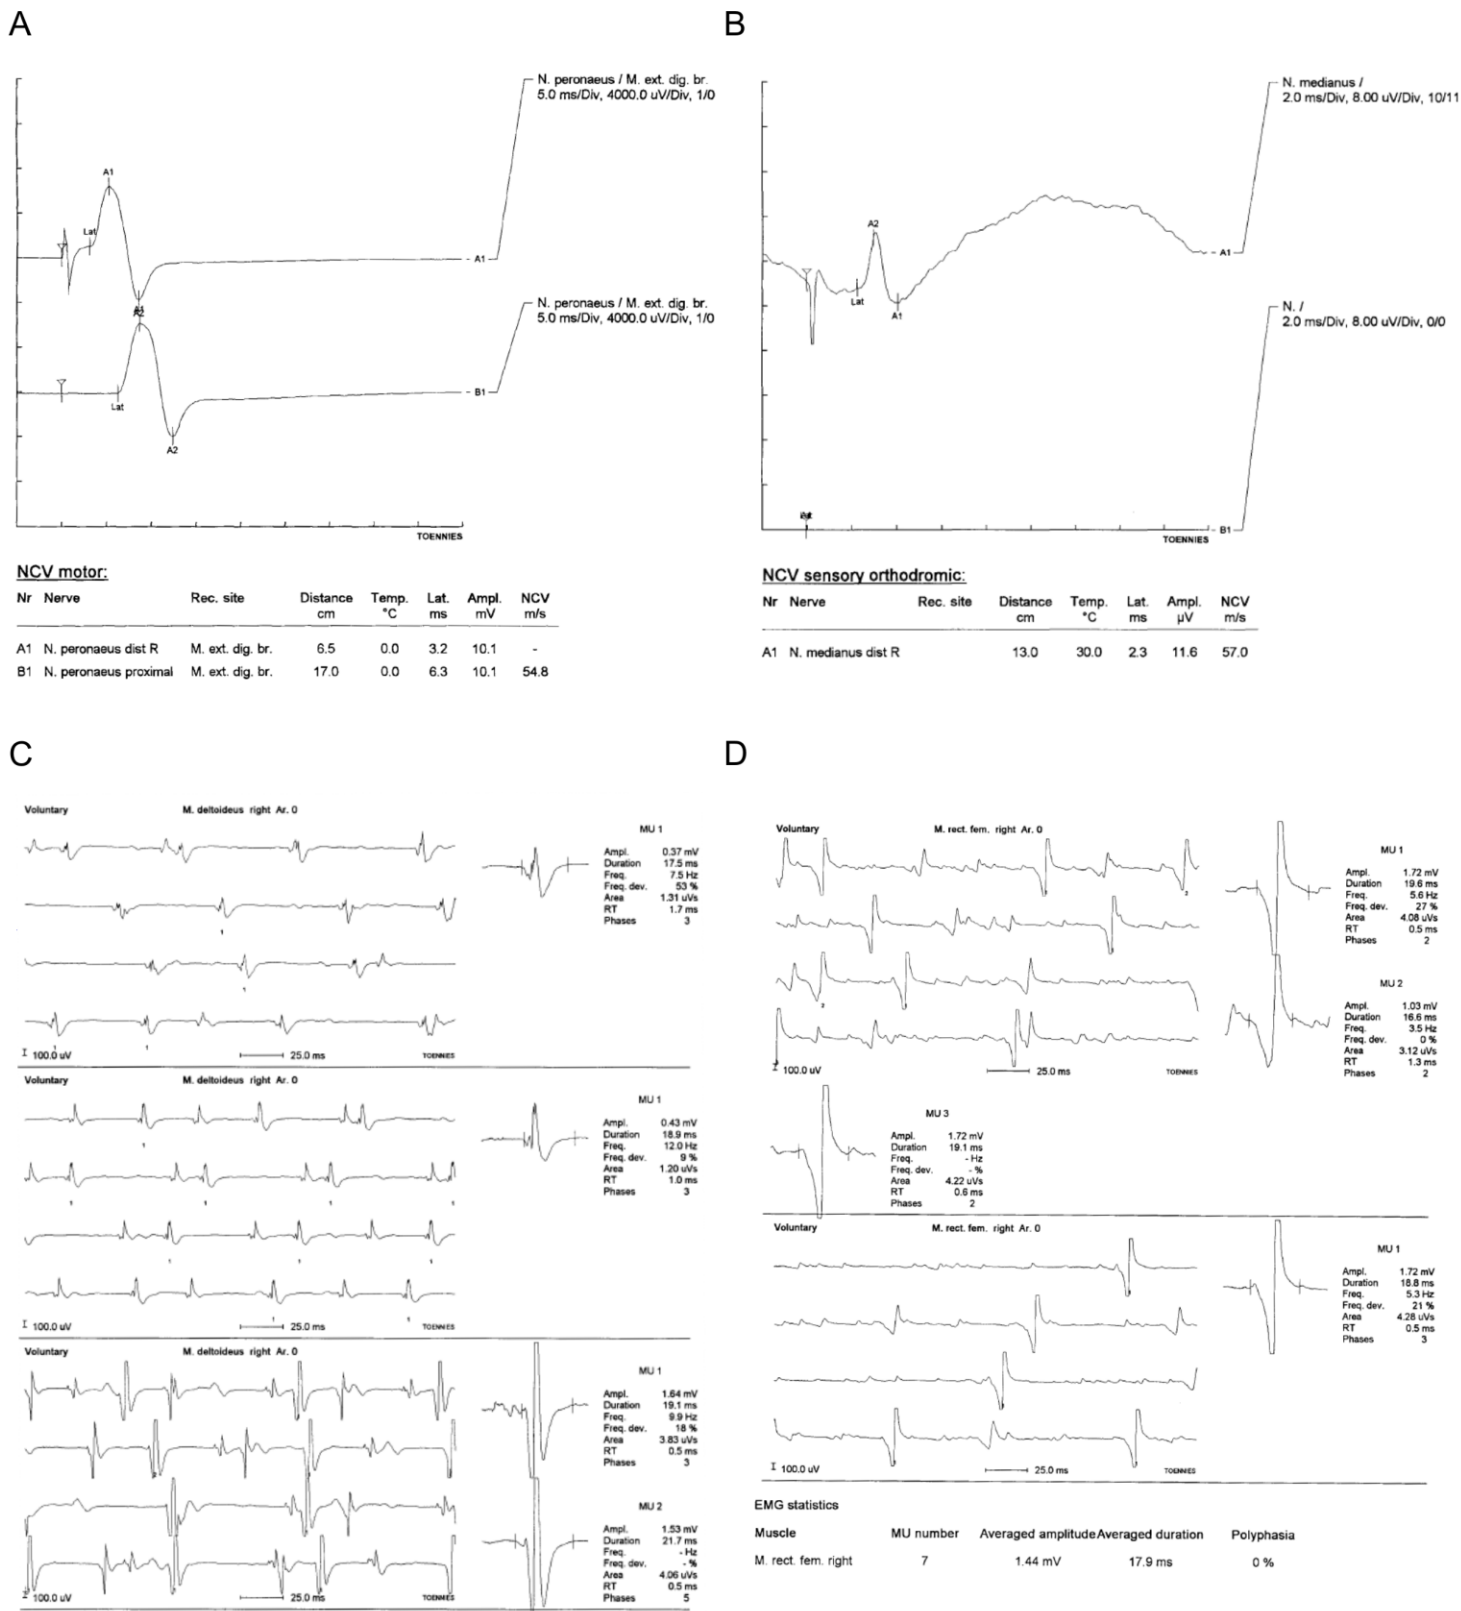

**Figure S1. Nerve Conduction and EMG Findings in Individual 177.IV.3**

Normal motor (A) and sensory (B) conduction velocities. Anterior horn involvement with giant potentials from EMG of upper (C) and lower (D) limbs.

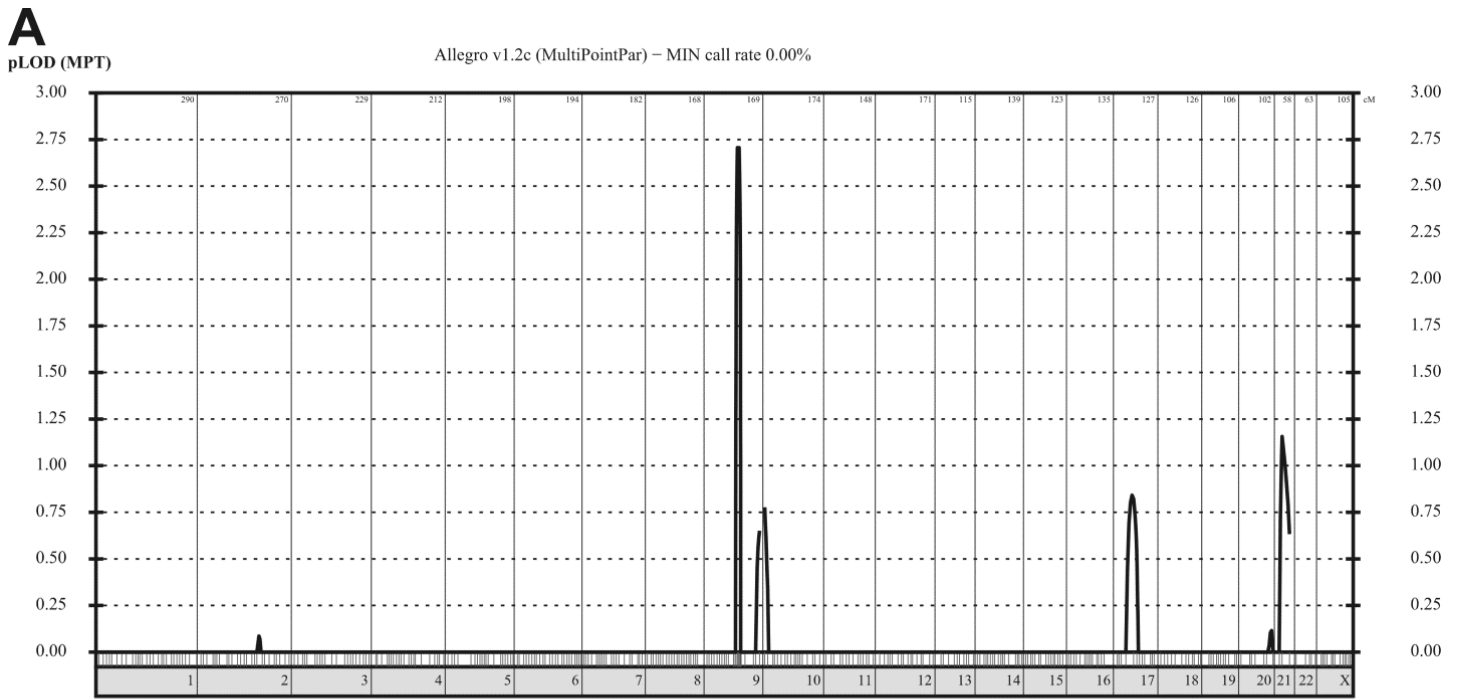

Marker coverage and chromosomes

Copyright ©, Tom H. Lindner & Katrin Hoffmann  
easyLINKAGE Plus v5.08, January 12, 2007

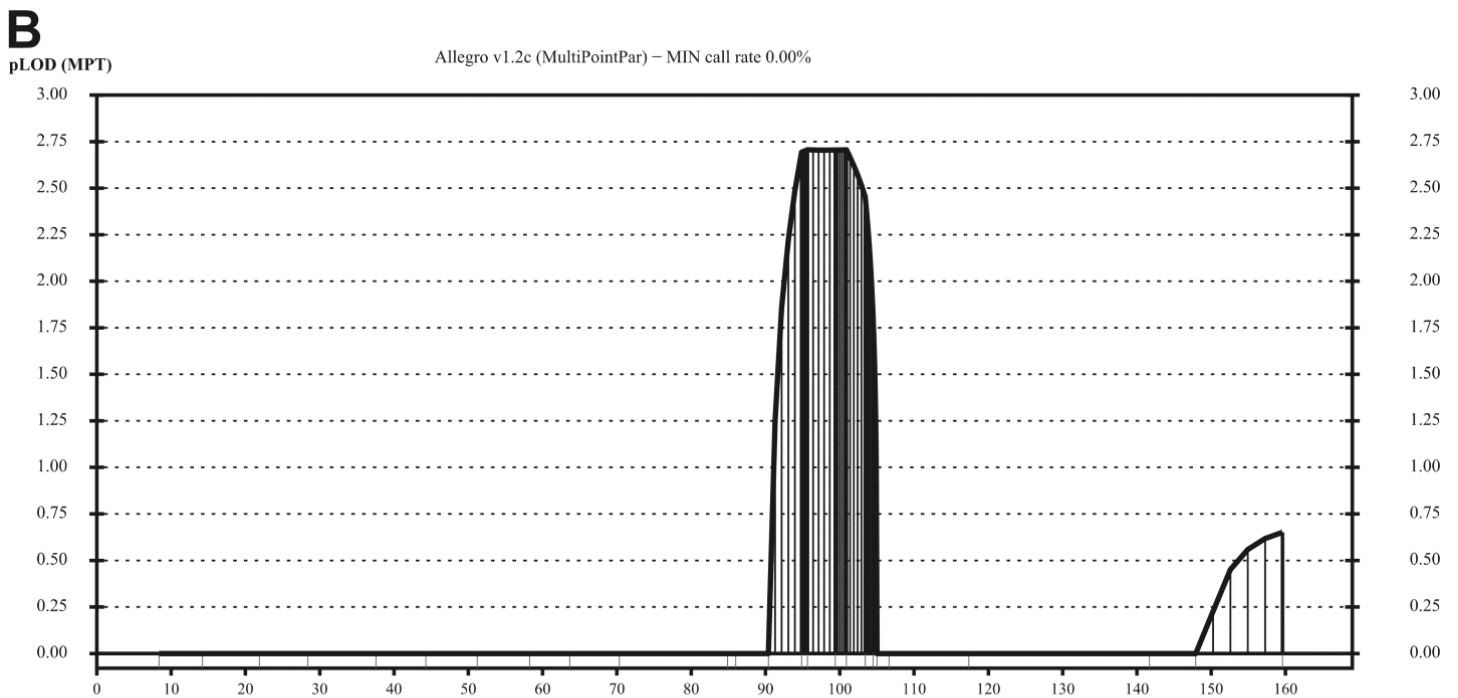

Marker coverage, genetic position from 9pter [cM]

Copyright ©, Tom H. Lindner & Katrin Hoffmann  
easyLINKAGE Plus v5.08, January 12, 2007

**Figure S2. Multipoint Parametric Linkage Analysis in Family 177**

(A) Linkage plot of genome-wide analysis with STR markers generated by easyLinkage with Allegro v1.2c and representing the parametric LOD score values on the y-axis in relation to genetic position on the x-axis. Human chromosomes are concatenated from p-ter (left) to q-ter (right) on the x-axis.  $pLOD_{max} = 2.71$  on chr9q. (B) Plot of linkage analysis on chr9 after finemapping with additional polymorphic STR markers. The genetic distance is given in cM.

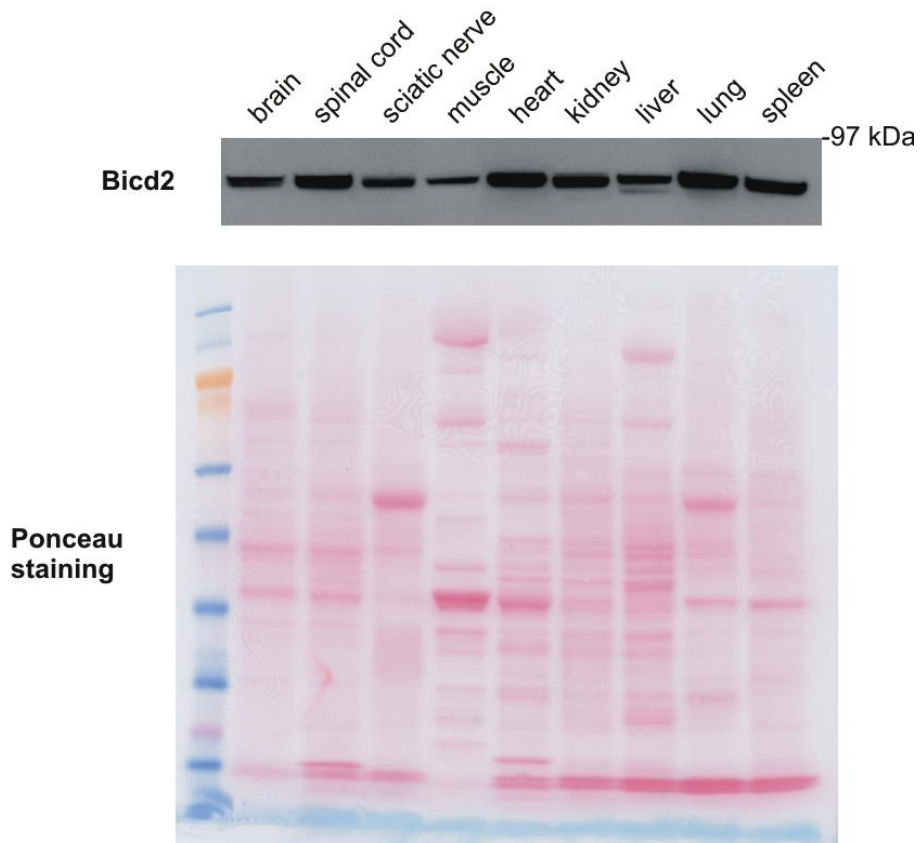

**Figure S3. Bcd2 Protein Levels in Mouse Tissues**

Immunoblotting analysis showing the Bcd2 protein levels in different mouse tissues. Ponceau staining confirms comparable loading of the samples.
